# Supplementary material for: A multifunctional 3D dressing unit based on the core–shell hydrogel microfiber for diabetic foot wound healing
Source: Royal Society of Chemistry journal article supplement (doi:10.1039/d2bm00029f), 2022-01-01
Supplement: d2bm00029f1.pdf [file d2bm00029f1.pdf]

## Supporting information

### **Multifunctional 3D dressing unit based on the core-shell hydrogel microfiber for diabetic foot wound healing**

Qiwei Huang,<sup>a</sup> Tingbin Wu,<sup>a</sup> Lihuan Wang,<sup>a</sup> Jichang Zhu,<sup>a</sup> Yongshi Guo,<sup>a</sup> Xi Yu,<sup>a</sup> Longfei Fan,<sup>a</sup>  
John H. Xin,<sup>b</sup> Hui Yu<sup>\*a</sup>

<sup>a</sup> Guangdong-Hong Kong Joint Laboratory for New Textile Materials, School of Textile Materials  
and Engineering, Wuyi University, Jiangmen, 529020, China

<sup>b</sup> Institute of Textiles & Clothing, The Hong Kong Polytechnic University, Hung Hom, Kowloon,  
Hong Kong, China

**\*To whom correspondence should be addressed:**

E-mail: yuhuihui\_2000@163.com (Hui Yu)

Tel/fax: +86-750-3296413

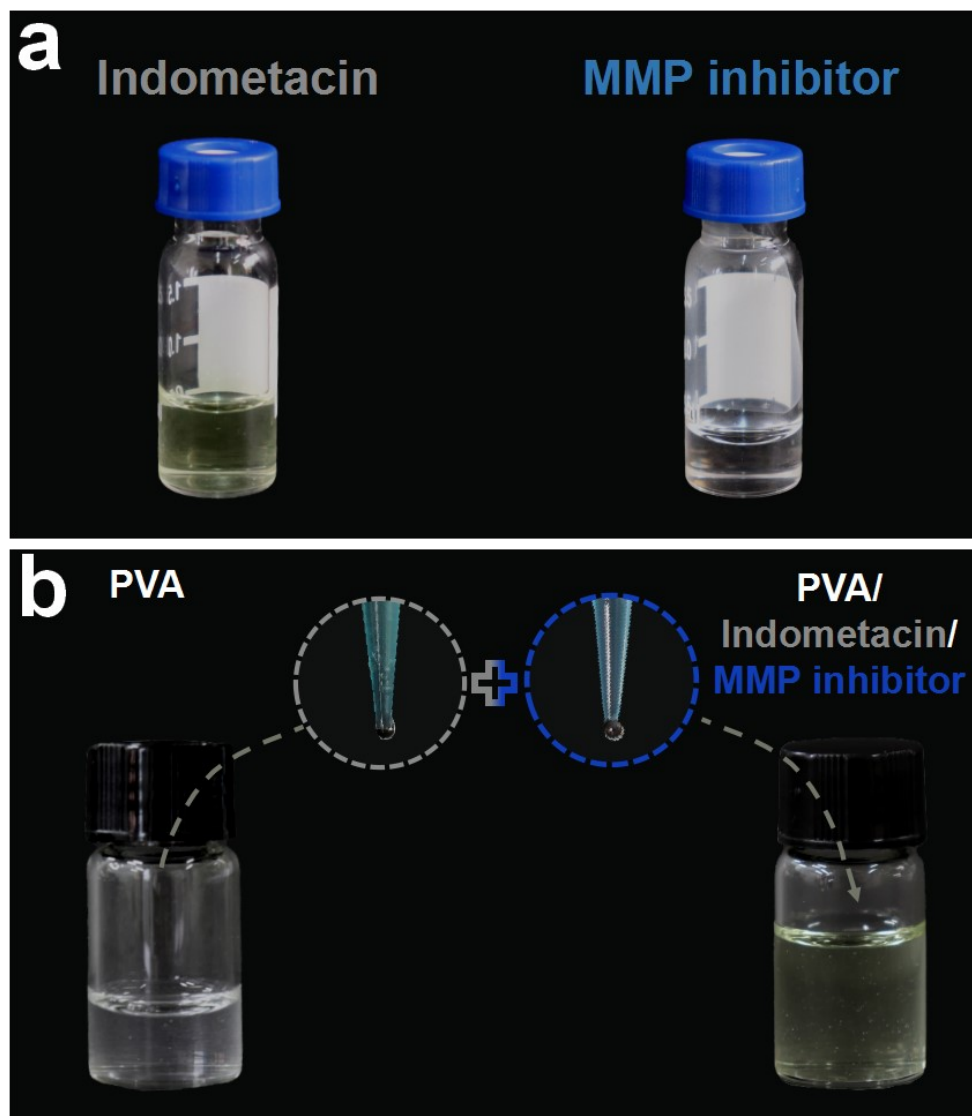

**Fig. S1** Preparation of the functional bio-ink. (a) Photographs of indomethacin and MMP inhibitor solutions; (b) Photograph of the preparation of PVA/INDO/MMPI functional bio-ink.

# Coaxial printhead

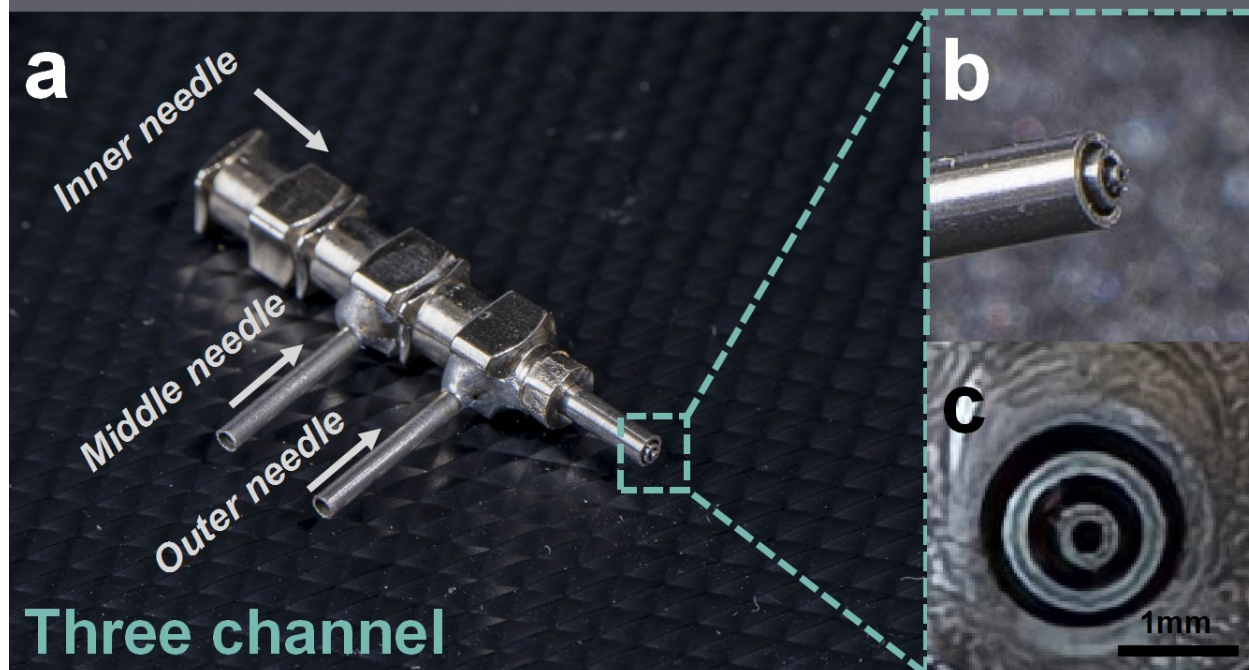

**Fig. S2** Coaxial biological 3D printing coaxial printhead. (a) Photograph of the three-channel printhead. Magnified photographs of the (b) side view and (c) front view of the nozzle.

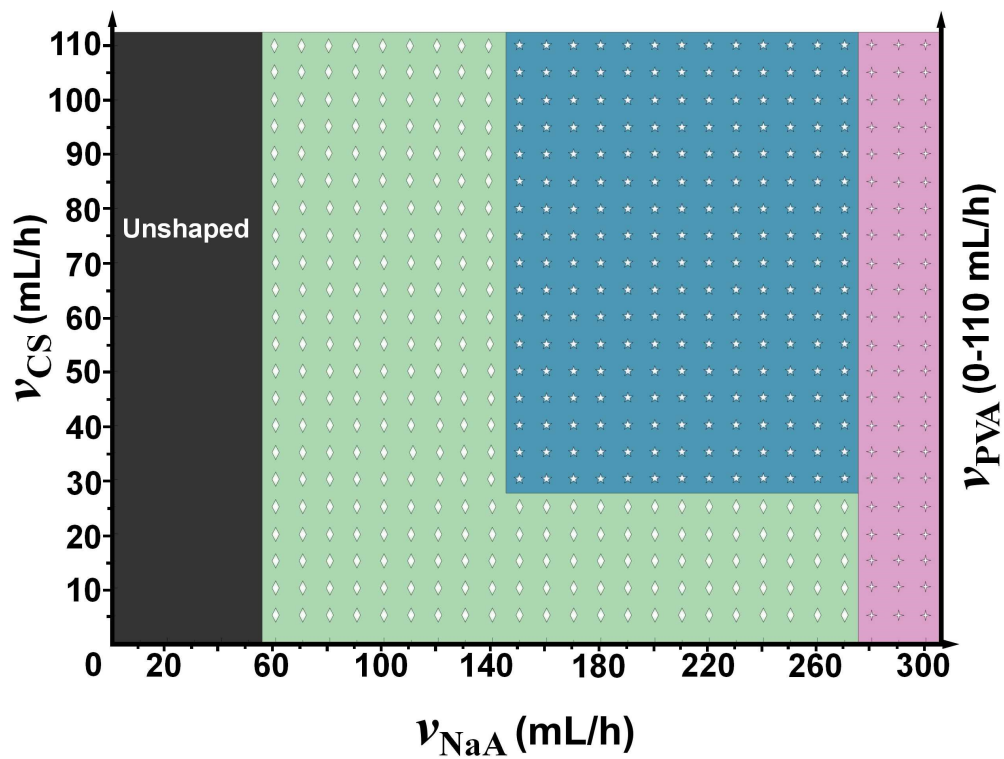

**Fig. S3** Parameter diagram for the flow velocities used to fabricate the multifunction core-shell hydrogel fibers *via* coaxial biological 3D printing. Black: unshaped area; blue: flow velocity area; green: spinnable area; pink: non-microfluidic 3D printing area.

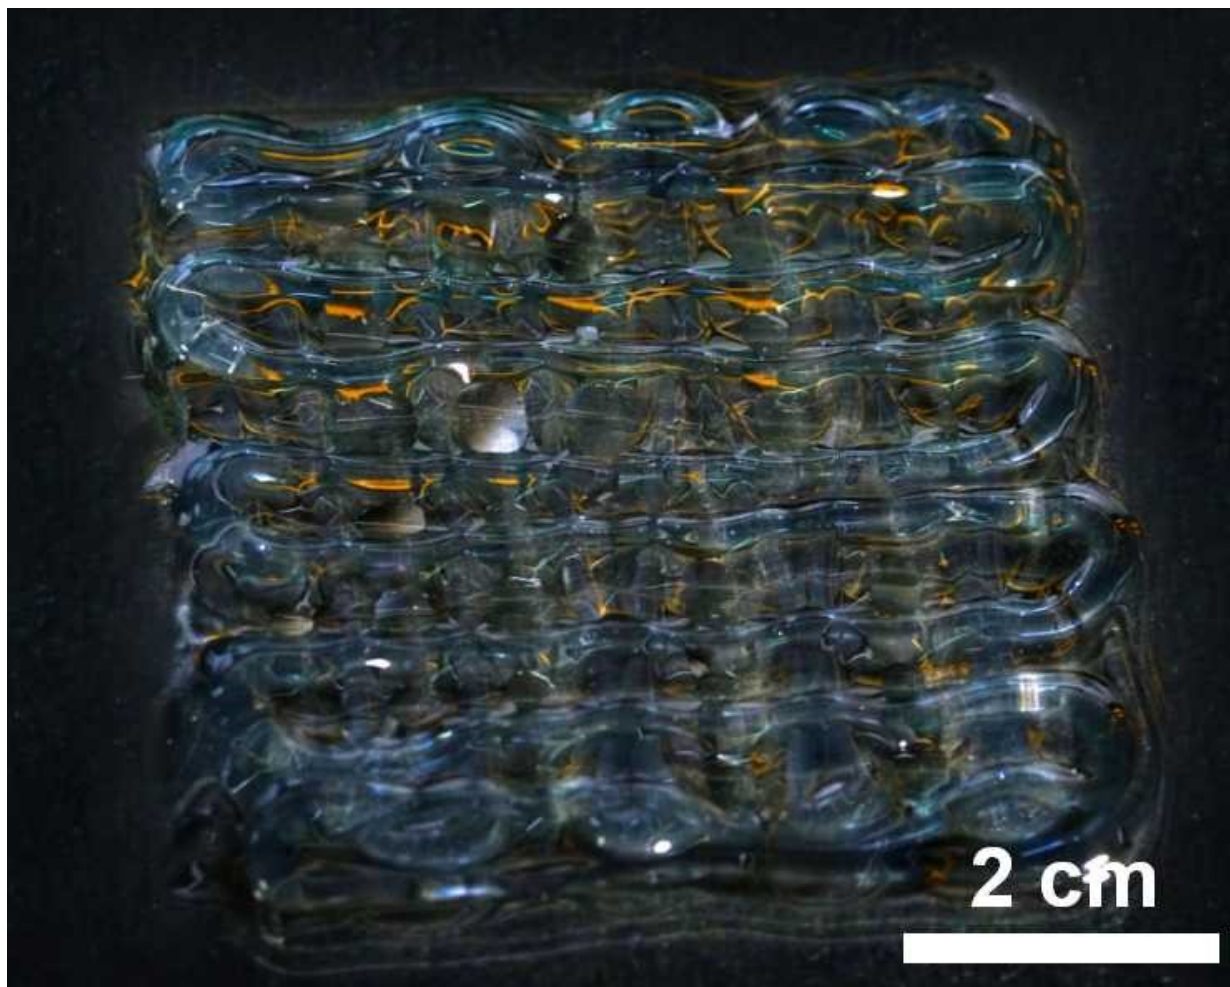

**Fig. S4** Representative photograph of a hydrogel fiber MF dressing.

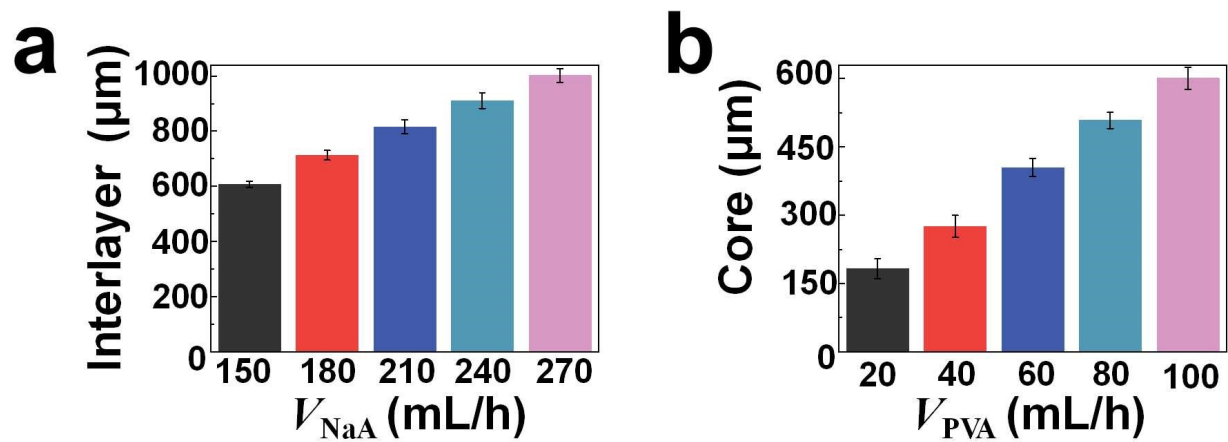

**Fig. S5** Effect of (a) core flow velocity ( $v_{\text{NaA}}$ ) and (b) sample flow velocity ( $v_{\text{PVA}}$ ) on the thickness of the middle layer and core layer, respectively, of CNP core-shell hydrogel fibers.

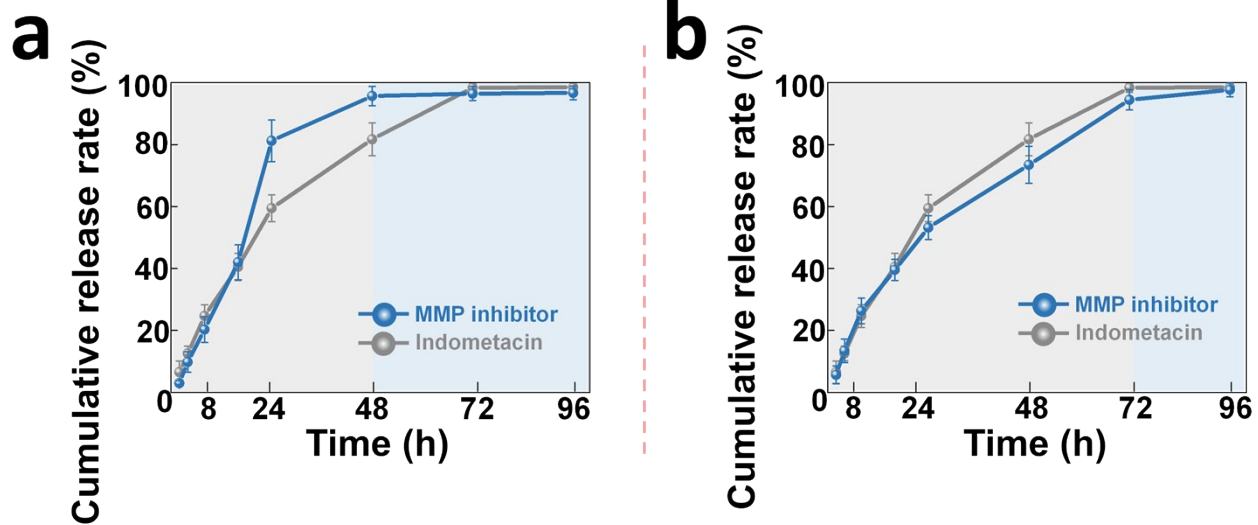

**Fig. S6** Controllable drug release. (a) Cumulative release rate of the MMP inhibitor loaded in the NaA middle layer and indomethacin loaded in the PVA core layer over time; (b) Cumulative release rate of the drugs simultaneously loaded in the PVA core layer.

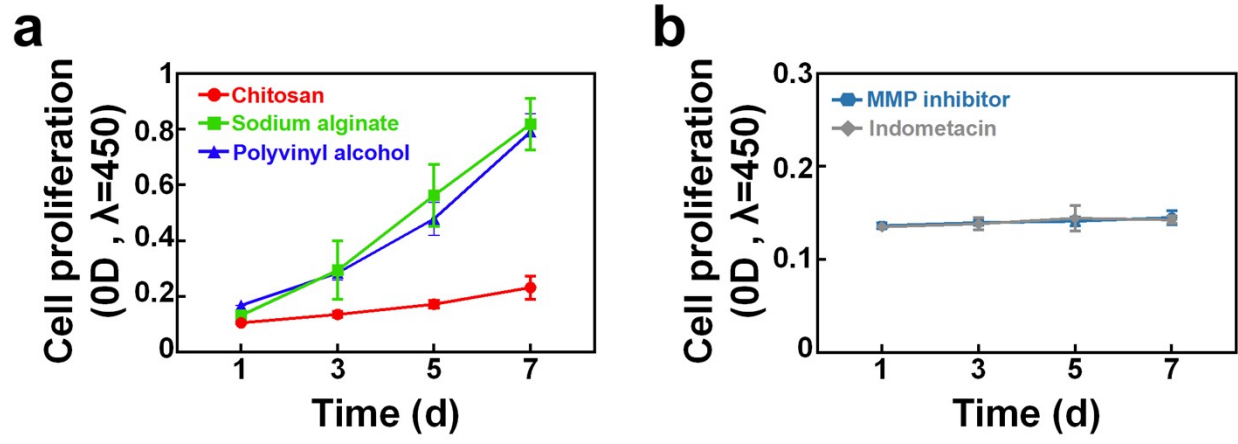

**Fig. S7** Cytotoxicity testing of individual components of the MF dressing. (a) Cytotoxicity of chitosan, sodium alginate and polyvinyl alcohol; (b) Cytotoxicity of MMP inhibitor and indometacin.



**Table. S1** Design parameters of the printhead used in the experiments. OD: outer diameter; ID: inner diameter.

| <b>Nozzle type</b>                                | <b>Inner channel<br/>(OD/ID)</b> | <b>Middle channel<br/>(OD/ID)</b> | <b>Outer channel<br/>(OD/ID)</b> |
|---------------------------------------------------|----------------------------------|-----------------------------------|----------------------------------|
| Three-layered<br>coaxial 3D printing<br>printhead | 500/260 $\mu\text{m}$            | 1250/850 $\mu\text{m}$            | 2100/1750 $\mu\text{m}$          |
